# Supplementary material for: A Case of Lithium Encephalopathy with Therapeutic Lithium Levels: The Diagnostic Role of EEG
Source: Hindawi journal article supplement (doi:10.1155/2022/8052471), 2022-12-16
Supplement: f1 [file 8052471.f1.zip]

## Consent to publication

I agree that information about me and/or my photographs can be published in a Hindawi journal (<https://www.hindawi.com/journals/>). I understand that:

- Although my name will not be published and the authors will remove as much identifying information as possible, complete anonymity is not guaranteed and I might be identified from the published article.
- Hindawi articles are published online under a Creative Commons Attribution License (<https://creativecommons.org/licenses/by/4.0/>) that allows anyone to reuse the article and its images provided they give credit to the authors.
- The manuscript may change during the review and production processes.
- Once the article is published, I cannot remove my consent.

Name of subject described and/or pictured:

Stefania Papucci

---

If the subject is a minor (child), unable to consent, not competent, or deceased, I agree for them. Name of person giving consent (if different):

---

Relationship to subject of person giving consent (if different):

---

Manuscript title:

A case of lithium encephalopathy with therapeutic lithium levels: the diagnostic role of EEG

---

Author:

Carmassi Claudia, Nardi Benedetta, Battaglini Simone, Bonelli Chiara, Violi Miriam, Bonanni Enrica, Dell'Osso Liliana

---

I have seen a copy of the manuscript: **X**

or

I waive the right to see a copy of the manuscript: •

Signature of subject

*Papucci Stefania*

Date:

10/09/2022

---

Signature of author:

*Nardi Benedetta*

Date:

10/09/2022

---

*This form will be retained by the authors and made available to Hindawi only on request*
