# Supplementary material for: A Case of Lithium Encephalopathy with Therapeutic Lithium Levels: The Diagnostic Role of EEG
Source: Case Rep Psychiatry. 2022 Dec 16;2022:8052471. doi: 10.1155/2022/8052471 (PMC9788879; doi:10.1155/2022/8052471)
Supplement: Supplementary Materials — The supplementary file “EEG” reports the electroencephalogram performed on the patient during the hospitalization, also reported in Figures 1 and 2. A written consent for publication was given by the patient, after seeing the copy of the manuscript, agreeing that the authors have removed as much identifying information as possible. [file 8052471.f1.zip]

Archive with 3 entries (3 files):
- 8052471.f1/Consent_to_publication_form-2.pdf
- 8052471.f1/EEG_1_b (1).docx
- 8052471.f1/EEG_2_b (1).docx
